# Supplementary material for: Materials in the CaO-K2O-SO3-H2O System Based on Powder Mixtures including Calciolangbeinite K2Ca2(SO4)3 and Calcium Sulfate Anhydrite CaSO4
Source: MDPI journal article supplement (doi:10.3390/ceramics6030088), 2023-07-05
Supplement: s1 [file s1]

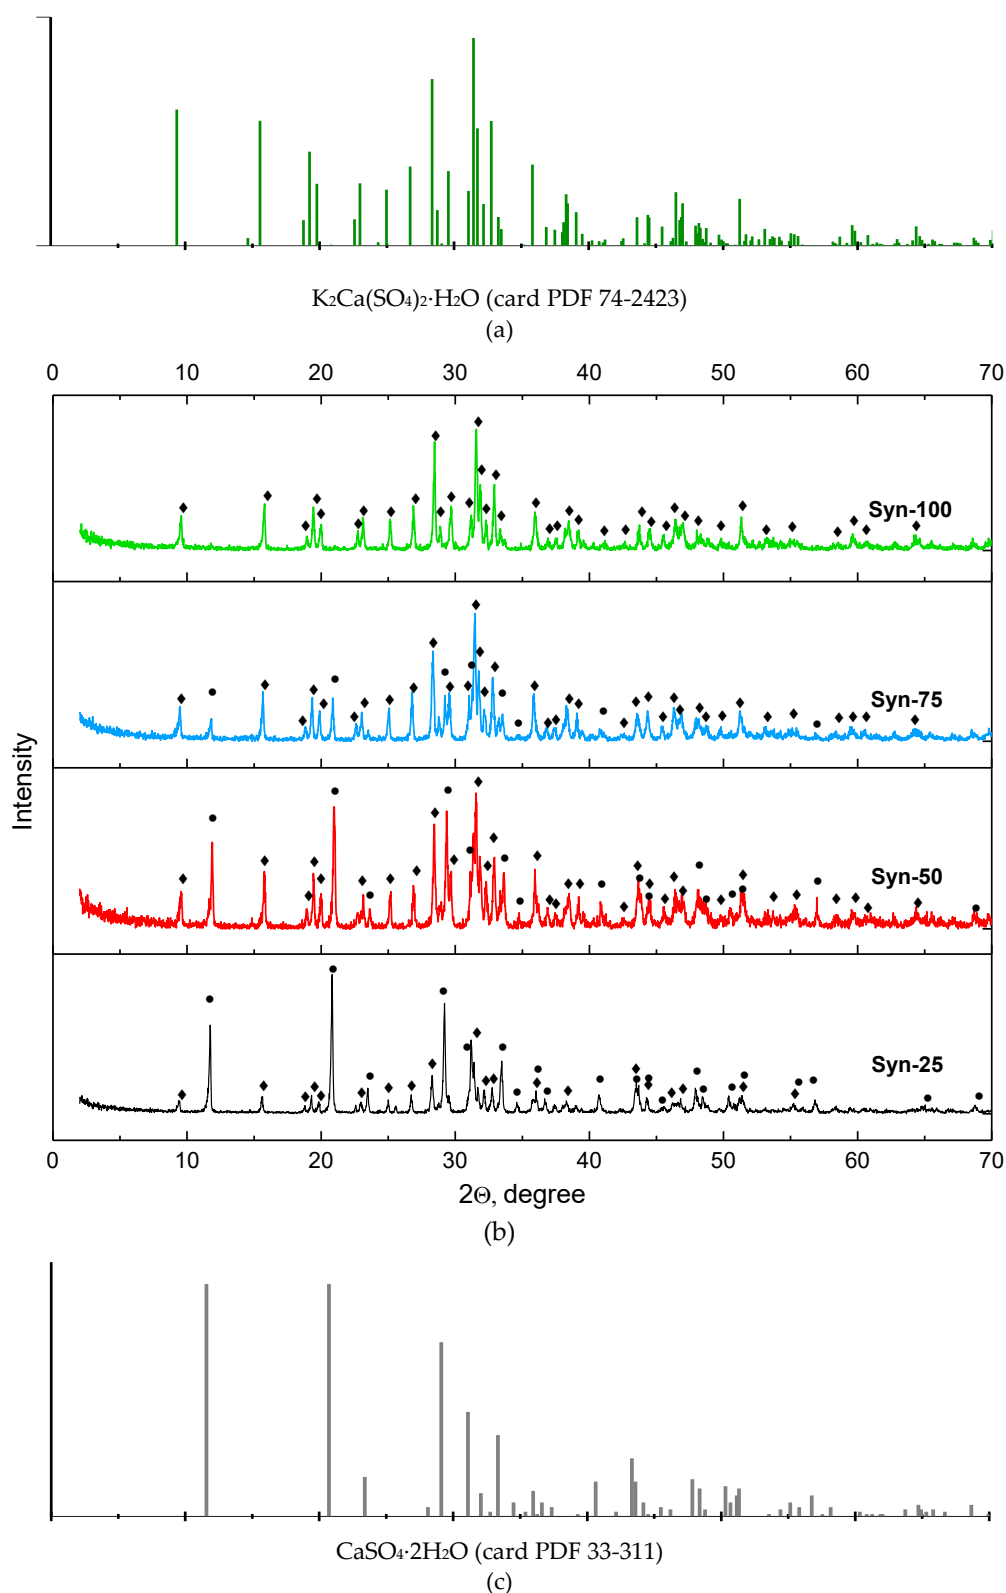

**Figure S1.** Graphs of XRD reflexes of  $\text{K}_2\text{Ca}(\text{SO}_4)_2 \cdot \text{H}_2\text{O}$  (card PDF 74-2423) (a) and  $\text{CaSO}_4 \cdot 2\text{H}_2\text{O}$  (card PDF 33-311) (c), and XRD data with symbols for peak indexing (b) of cement stone samples obtained in the  $\text{CaO-K}_2\text{O-SO}_3\text{-H}_2\text{O}$  system:

● -  $\text{CaSO}_4 \cdot 2\text{H}_2\text{O}$  (card PDF 33-311); ◆ -  $\text{K}_2\text{Ca}(\text{SO}_4)_2 \cdot \text{H}_2\text{O}$  (card PDF 74-2423)
